# Supplementary material
Source: Elsevier journal article supplement (https://publikationen.ub.uni-frankfurt.de/opus4/files/53563/mmc3.docx)
Supplement: mmc3 [file mmc3.docx]

**Supplemental Material**

**Table 1. MRI multi-center standard sequences description:**

| **Database** | **Scanner** | **Patients** | **Parameters** | **T1w** | **DWI** | **FLAIR** |
| --- | --- | --- | --- | --- | --- | --- |
| Beer Sheva, Israel | Intera, Philips 1·5T | Controls *n*=21 | TR/TE (ms) FOV (mm) Voxel (mm)  Flip Angle | 1·4/3·1  256x256  0·449x0·449x5  Flip=80 | 3860/95  256x256  0·89x0·89x6  90 | 6500/120  230x230  0·8x0·8x5  90 |
| Berlin Germany | Magnetom Avanto Siemens 1·5T | SAH  *n*=44 | TR/TE (ms) FOV (mm) Voxel (mm)  Flip Angle | 679/7·8  448x512  0·449x0·449x6  90 | 3400/88  128x128  1·8x1·8x6  90 | 9000/113  448x512  0·449x0·449x6  180 |
| Berlin, Germany | Philips Medical Systems Intera 1·5T | SAH  *n*=50 | TR/TE (ms) FOV (mm) Voxel (mm)  Flip Angle | 500/15  256x256  0·89x0·89x6  90 | 4504/89  256x256  0·89x0·89x6  90 | 6000/120  256x256  0·89x0·89x6  90 |
| Bonn Germany | Magnetom Verio  Siemens 3T | SAH  *n*=18 | TR/TE (ms) FOV (mm) Voxel (mm)  Flip Angle |  | 4900/88  130x130  1·69x1·69x5  90 | 6000/133  256x256  0·89x0·89x6  130 |
| Heidelberg,  Germany | Magnetom Espree eco Siemens 1·5T | SAH  *n*=6 | TR/TE (ms) FOV (mm) Voxel (mm)  Flip Angle | 450/14  512x512  0·449x0·449x6  90 | 4332/95  256x256  0·89x0·89x6  90 | 6000/120  512x512  0·449x0·449x6  90 |
| Köln  Germany | Philips Medical Systems Intera 1·5T | SAH  *n*=6 | TR/TE (ms) FOV (mm) Voxel (mm)  Flip Angle | 500/15  256x256  0·89x0·89x6  90 | 4504/89  256x256  0·89x0·89x6  90 | 6000/120  256x256  0·89x0·89x6  90 |

**Table 2. Study timeline and *ABT* growth data**

1. **Time intervals (number of days after aneurism event):**

| ***Time Interval*** | ***Median (IQR)*** | ***Min*** | ***Max*** |
| --- | --- | --- | --- |
| *t1* | 1·3 (0·5-1·9)* | 0·1 | 2·2 |
| *t2* | 7·2 (6·3-7·7)* | 2·9 | 9·2 |
| *t3* | 13·8 (13·1-15·3)* | 10·4 | 19·3 |
| *t4* | 267·6 (196·6-358·2)* | 59·4 | 1472·3 |

1. **ABT growth measured at t2-t4 time intervals vs t1, folds:**

|  | ***Median (ISQ) PC*** | ***Median (ISQ) NPC*** | ***Min PC*** | ***Max NPC*** | ***p-value (PC vs NPC)§*** | ***number of PC*** | ***number of NPC*** |
| --- | --- | --- | --- | --- | --- | --- | --- |
| *t4/t1* | 1·63 (1·20-2·43) | 0·66 (0·48-0·80) | 1·08 | 0·89 | <0·0001 | 37 | 33 |
| *t3/t1* | 1·35 (1·09-1·68) | 0·63 (0·54-0·80) | 0·96 | 1·15 | 0·0001 | 71 | 40 |
| *t2/t1* | 1·26 (0·99-1·42) | 0·71 (0·49-0·84) | 0·94 | 1·12 | 0·0019 | 47 | 25 |

* Friedman test showed significant difference between different time intervals (p<0·0001).

*§* withWilcoxon rank-sum test.

**Table 3. Relationship between statuses at admission, clinical outcome, and aSAH course:**

|  | ***Accuracy*** | ***Sensitivity*** | ***Specificity*** |
| --- | --- | --- | --- |
| WFNS vs RMS | 0·7500 | 0·9655 | 0·6842 |
| WFNS vs eGOS | 0·6696 | 0·6744 | 0·6667 |
| RMS vs eGOS | 0·7411 | 0·7692 | 0·7326 |
| WFNS vs aSAH course | 0·6613 | 0·6739 | 0·6536 |
| RMS vs aSAH course | 0·7016 | 0·6552 | 0·7158 |
| eGOS vs aSAH course | 0·9732 | 0·9762 | 0·9714 |
